# Supplementary material for: Historical Isolation versus Recent Long-Distance Connections between Europe and Africa in Bifid Toadflaxes (Linaria sect. Versicolores)
Source: PubMed Central journal article supplement (PMC3136523; doi:10.1371/journal.pone.0022234), 2011-07-14
Supplement: pone.0022234.s001.pdf [file pone.0022234.s001.pdf]

| Taxon                                                    | (Population No.) Sampled locality                                                                                                                                                                                         | Voucher                                                                                                                                                                                                                                                                      | Sequence /<br>haplotype<br>code   | <i>rp32-trnL</i> <sup>UAG</sup><br>accession<br>no.                  | <i>trnK-matK</i><br>accession<br>no.                                 |
|----------------------------------------------------------|---------------------------------------------------------------------------------------------------------------------------------------------------------------------------------------------------------------------------|------------------------------------------------------------------------------------------------------------------------------------------------------------------------------------------------------------------------------------------------------------------------------|-----------------------------------|----------------------------------------------------------------------|----------------------------------------------------------------------|
| <i>Antirrhinum</i> L.                                    |                                                                                                                                                                                                                           |                                                                                                                                                                                                                                                                              |                                   |                                                                      |                                                                      |
| <i>Antirrhinum graniticum</i> Rothm.                     | Spain, Cáceres, Trujillo                                                                                                                                                                                                  | P. Vargas 213PV06 (MA)                                                                                                                                                                                                                                                       | -                                 | JF694120                                                             | JF694188                                                             |
| <i>Chaenorhinum</i> (DC.) Reichenb.                      |                                                                                                                                                                                                                           |                                                                                                                                                                                                                                                                              |                                   |                                                                      |                                                                      |
| <i>Chaenorhinum macropodum</i> (Boiss. & Reuter) Lange   | Spain, Málaga, Cómputa                                                                                                                                                                                                    | P. Vargas 27PV08 (MA)                                                                                                                                                                                                                                                        | -                                 | JF694119                                                             | JF694187                                                             |
| <i>Linaria</i> Mill.                                     |                                                                                                                                                                                                                           |                                                                                                                                                                                                                                                                              |                                   |                                                                      |                                                                      |
| <i>Linaria</i> sect. <i>Diffusae</i> (Benth) Wettst.     |                                                                                                                                                                                                                           |                                                                                                                                                                                                                                                                              |                                   |                                                                      |                                                                      |
| <i>L. reflexa</i> (L.) Chaz.                             | Algeria, Algiers                                                                                                                                                                                                          | J.J. Aldasoro A9799 (MA)                                                                                                                                                                                                                                                     | -                                 | JF694129                                                             | JF694197                                                             |
| <i>Linaria</i> sect. <i>Linaria</i>                      |                                                                                                                                                                                                                           |                                                                                                                                                                                                                                                                              |                                   |                                                                      |                                                                      |
| <i>L. vulgaris</i> Miller                                | France, Chamonix                                                                                                                                                                                                          | B. Estébanez s.n. (MA)                                                                                                                                                                                                                                                       | -                                 | JF694126                                                             | JF694194                                                             |
| <i>Linaria</i> sect. <i>Macrocentrum</i> D.A. Sutton     |                                                                                                                                                                                                                           |                                                                                                                                                                                                                                                                              |                                   |                                                                      |                                                                      |
| <i>L. chalepensis</i> (L.) Miller                        | Cyprus, Larnaca, Cape Kiti                                                                                                                                                                                                | Iter Mediterraneum IV 294 (MA)                                                                                                                                                                                                                                               | -                                 | JF694127                                                             | JF694195                                                             |
| <i>Linaria</i> sect. <i>Pelisserianae</i> Valdés         |                                                                                                                                                                                                                           |                                                                                                                                                                                                                                                                              |                                   |                                                                      |                                                                      |
| <i>L. triornithophora</i> (L.) Willd.                    | Spain, Cáceres, Puerto de Perales                                                                                                                                                                                         | M. Fernández-Mazuecos 18MF07 (MA)                                                                                                                                                                                                                                            | -                                 | JF694128                                                             | JF694196                                                             |
| <i>Linaria</i> sect. <i>Speciosae</i> (Benth) Wettst.    |                                                                                                                                                                                                                           |                                                                                                                                                                                                                                                                              |                                   |                                                                      |                                                                      |
| <i>L. genistifolia</i> (L.) Miller                       | Turkey, Hadim-Bezkir                                                                                                                                                                                                      | J.J. Aldasoro & M.L. Alarcón A9751 (MA)                                                                                                                                                                                                                                      | -                                 | JF694124                                                             | JF694192                                                             |
| <i>L. repens</i> (L.) Miller                             | Spain, Cuencia, Beteta                                                                                                                                                                                                    | M. Fernández-Mazuecos 54MF09 (MA)                                                                                                                                                                                                                                            | -                                 | JF694125                                                             | JF694193                                                             |
| <i>Linaria</i> sect. <i>Supinae</i> (Benth) Wettst.      |                                                                                                                                                                                                                           |                                                                                                                                                                                                                                                                              |                                   |                                                                      |                                                                      |
| <i>L. alpina</i> (L.) Miller                             | Spain, Huesca, Bujaruelo                                                                                                                                                                                                  | J. Güemes s.n. (MA)                                                                                                                                                                                                                                                          | -                                 | JF694121                                                             | JF694189                                                             |
| <i>L. amoii</i> Campo ex Amo                             | Spain, Málaga, Cómputa                                                                                                                                                                                                    | M. Fernández-Mazuecos, A.D. Forrest & P. Vargas 30PV08 (MA)                                                                                                                                                                                                                  | -                                 | JF694122                                                             | JF694190                                                             |
| <i>L. micrantha</i> (Cav.) Hoffmanns. & Link             | Spain, Alicante, Vall de Gallinera                                                                                                                                                                                        | J.X. Soler & M. Signes 1530-JXS (MA)                                                                                                                                                                                                                                         | -                                 | JF694123                                                             | JF694191                                                             |
| <i>Linaria</i> sect. <i>Versicolores</i> (Benth) Wettst. |                                                                                                                                                                                                                           |                                                                                                                                                                                                                                                                              |                                   |                                                                      |                                                                      |
| Subsect. <i>Versicolores</i>                             |                                                                                                                                                                                                                           |                                                                                                                                                                                                                                                                              |                                   |                                                                      |                                                                      |
| <i>L. algarviana</i> Chav.                               | Portugal, Cabo de São Vicente                                                                                                                                                                                             | M. Fernández-Mazuecos 11MF09 (MA)                                                                                                                                                                                                                                            | lb6                               | JF694130                                                             | JF694198                                                             |
| <i>L. bipartita</i> (Vent.) Willd.                       | (1) Morocco, Rabat<br>(2) Morocco, Tamri                                                                                                                                                                                  | S.L. Jury with R.G. Wilson 18558 (RNG)<br>S.L. Jury, B. Tahmi & T.M. Upson 14293 (RNG)                                                                                                                                                                                       | 17<br>17                          | JF694131<br>JF694132                                                 | JF694199<br>JF694200                                                 |
| <i>L. bordiana</i> Santa & Simonneau                     | (1) Algeria, Mostaganem – Tenes<br>(2) Algeria, Sidi Lakhdar                                                                                                                                                              | Davis 51833 (RNG)<br>D.A. & S.J. Sutton 172 (RNG)                                                                                                                                                                                                                            | 13<br>14                          | JF694134<br>JF694133                                                 | JF694202<br>JF694201                                                 |
| <i>L. clementei</i> Haenseler ex Boiss.                  | (1) Spain, Málaga, Alhaurín de la Torre<br>(2) Spain, Málaga, Coín                                                                                                                                                        | M. Fernández-Mazuecos, A.D. Forrest & P. Vargas 7MF08 (MA)<br>M. Fernández-Mazuecos & J. Ramírez 24MF09 (MA)                                                                                                                                                                 | lb2<br>lb1                        | JF694135<br>JF694136                                                 | JF694203<br>JF694204                                                 |
| <i>L. gharbensis</i> Batt. & Pitard                      | (1) Morocco, Bou Ahmed<br>(2) Morocco, Chefchaouen<br>(3) Morocco, Rabat<br>(4) Spain, Huelva, Gibraleón                                                                                                                  | S.L. Jury, A. Taleb, T.M. Upson & G.S. Waltens 13406 (RNG)<br>J. Montserrat & J. Vicens JMM-4193/5 (RNG)<br>S.L. Jury & R.G. Wilson 18559 (RNG)<br>M. Fernández-Mazuecos, J.L. Blanco & E. Sánchez-Gullón 7MF09 (MA)                                                         | 16<br>5<br>7<br>6                 | JF694137<br>JF694177<br>JF694138<br>JF694139                         | JF694205<br>JF694245<br>JF694206<br>JF694207                         |
| <i>L. hellenica</i> Turill                               | Greece, Kambos                                                                                                                                                                                                            | Unknown collector (ATH)                                                                                                                                                                                                                                                      | 4                                 | JF694140                                                             | JF694208                                                             |
| <i>L. imzica</i> Gómiz                                   | Morocco, Jbel Imzi                                                                                                                                                                                                        | F. Gómiz s.n. (MA)                                                                                                                                                                                                                                                           | 21                                | JF694141                                                             | JF694209                                                             |
| <i>L. incarnata</i> (Vent.) Sprengel                     | (1) Morocco, Kenitra-Khemisset<br>(2) Morocco, Marrakech<br>(3) Morocco, Salé<br>(4) Spain, Badajoz, Alburquerque<br>(5) Spain, Salamanca, Pelabravo<br>(6) Spain, Huelva, Valverde del Camino (=L. <i>onubensis</i> Pau) | S. Martín-Bravo, I. Pulgar, F.J. Fernández, G.C. Mazo 34SMB06 (MA)<br>S.L. Jury 14151 (RNG)<br>J. Lambinon & G. van den Sande n°95/Ma/333 (RNG)<br>M. Fernández-Mazuecos 9MF09 (MA)<br>M. Fernández-Mazuecos & P. Vargas 39MF09 (MA)<br>V. Valcarcel & P. Vargas 5PV08 (MA)  | 8<br>23<br>7<br>lb6<br>lb7<br>lb6 | JF694142<br>JF694143<br>JF694144<br>JF694145<br>JF694146<br>JF694147 | JF694210<br>JF694211<br>JF694212<br>JF694213<br>JF694214<br>JF694215 |
| <i>L. maroccana</i> Hooker fil.                          | (1) Morocco, Imouzzer Valley<br>(2) Morocco, Marrakech – Tizi-n-Test                                                                                                                                                      | M. Ait Lafkih s.n. (RNG)<br>S.L. Jury, B. Tahiri & T.M. Upson 14209 (RNG)                                                                                                                                                                                                    | 23<br>22                          | JF694148<br>JF694149                                                 | JF694216<br>JF694217                                                 |
| <i>L. multicaulis</i> (L.) Miller                        |                                                                                                                                                                                                                           |                                                                                                                                                                                                                                                                              |                                   |                                                                      |                                                                      |
| subsp. <i>multicaulis</i>                                | Italy, Sicily, Etna                                                                                                                                                                                                       | I. Álvarez <i>et al.</i> IA1622 (MA)                                                                                                                                                                                                                                         | 12                                | JF694150                                                             | JF694218                                                             |
| subsp. <i>aurasiaca</i> (Pomel) D.A. Sutton              | Tunisia, El Kesra                                                                                                                                                                                                         | Davis & Lamond 57154 (RNG)                                                                                                                                                                                                                                                   | 11                                | JF694151                                                             | JF694219                                                             |
| subsp. <i>galioides</i> (Ball) D.A. Sutton               | (1) Morocco, Oukaimedem<br>(2) Morocco, Yagour                                                                                                                                                                            | P. Jiménez Mejías, E. Narbona, A.J. Chaparro & M. Parra 200PJM05 (UPOS)<br>A. Kool with H.J. Boer, P. Domínguez 904 (RNG)                                                                                                                                                    | 2<br>3                            | JF694152<br>JF694153                                                 | JF694220<br>JF694221                                                 |
| subsp. <i>heterophylla</i> (Desf.) D.A. Sutton           | (1) Algeria, Tikjda<br>(2) Morocco, Azrou<br>(3) Morocco, Beni-Hadifa<br>(4) Morocco, Jbel Tazekka<br>(5) Tunisia, Tabarka                                                                                                | Davis 53078 (RNG)<br>M. Fernández-Mazuecos & J.C. Moreno 15MF08 (MA)<br>B. Guzmán 108bBGA04 (MA)<br>E. Rico, S. Andrés & M. Santos SA-221 (SALA)<br>J.J. Aldasoro A2888 (MA)                                                                                                 | 1<br>20<br>18<br>19<br>16         | JF694154<br>JF694155<br>JF694156<br>JF694157<br>JF694158             | JF694222<br>JF694223<br>JF694224<br>JF694225<br>JF694226             |
| <i>L. pedunculata</i> (L.) Chaz.                         | (1) Morocco, Chefchaouen<br>(2) Morocco, Larache<br>(3) Morocco, Mdiq<br>(4) Morocco, Mohammedia<br>(5) Portugal, Monte Gordo<br>(6) Spain, Almería, Cabo de Gata                                                         | M.A. Mateos, M.C. Reina, G. Sangalli, N. Sardón & B. Valdés s.n. (RNG)<br>Silvestre, G.-Rowe & Vilches s.n. (RNG)<br>W. Lippert 24229 (RNG)<br>Aparicio, Rowe & Silvestre s.n. (RNG)<br>M. Fernández-Mazuecos & J.L. Blanco 61MF10 (MA)<br>M. Fernández-Mazuecos 30MF09 (MA) | 9<br>9<br>9<br>9<br>9<br>9        | JF694163<br>JF694167<br>JF694164<br>JF694165<br>JF694166<br>JF694159 | JF694231<br>JF694235<br>JF694232<br>JF694233<br>JF694234<br>JF694227 |

|                                               |                                        |                                                                        |     |          |          |
|-----------------------------------------------|----------------------------------------|------------------------------------------------------------------------|-----|----------|----------|
|                                               | (7) Spain, Cádiz, Barbate              | E. Sánchez-Gullón s.n. (MA)                                            | 9   | JF694160 | JF694228 |
|                                               | (8) Spain, Huelva, Marismas del Odiel  | M. Fernández-Mazuecos, J.L. Blanco & E. Sánchez-Gullón 4MF09 (MA)      | 9   | JF694161 | JF694229 |
|                                               | (9) Spain, Málaga, Mijas               | M. Fernández-Mazuecos & J. Ramírez 27MF09 (MA)                         | 9   | JF694162 | JF694230 |
| <i>L. pinifolia</i> (Poiret) Thell.           | Tunisia, El Kala                       | A. Dubuis, H. Maurel & R. Rhamoun s.n. (RNG)                           | 16  | JF694168 | JF694236 |
| <i>L. pseudoviscosa</i> Murb.                 | Tunisia, El Haouaria                   | P. Wilkin & E.J. Wellens 231 (RNG)                                     | 10  | JF694169 | JF694237 |
| <i>L. salzmännii</i> Boiss.                   | Spain, Málaga, El Chorro               | M. Fernández-Mazuecos & J. Ramírez 19MF09 (MA)                         | 1b1 | JF694170 | JF694238 |
| <i>L. sparteae</i> (L.) Chaz.                 | (1) Spain, Madrid, Colmenar            | P. Vargas 101PV07 (MA)                                                 | 1b6 | JF694171 | JF694239 |
|                                               | (2) Spain, Soria, Tardelcuende         | M. Fernández-Mazuecos, A. Quiroga, S.C. Herrera & D. Orgaz 14MF07 (MA) | 1b3 | JF694172 | JF694240 |
| <i>L. tenuis</i> (Viv.) Sprengel              | (1) Libya, Tripoli                     | Davis & Boulos 50581 (RNG)                                             | 11  | JF694174 | JF694242 |
|                                               | (2) Libya, Gebel Nefoussa              | Davis 49632 (RNG)                                                      | 11  | JF694173 | JF694241 |
| <i>L. tingitana</i> Boiss. & Reuter           | (1) Algeria, El Macta                  | D.A. & S.J. Sutton 383 (RNG)                                           | 15  | JF694175 | JF694243 |
|                                               | (2) Morocco, Cap des Trois Fourches    | T.M. Upson and Ait Lafkih, M. Hassan, G.S. Walters 14012 (RNG)         | 16  | JF694176 | JF694244 |
| <i>L. viscosa</i> (L.) Chaz.                  |                                        |                                                                        |     |          |          |
| subsp. <i>viscosa</i>                         | (1) Spain, Huelva, Marismas del Odiel  | M. Fernández-Mazuecos, J.L. Blanco & E. Sánchez-Gullón 6MF09 (MA)      | 1b4 | JF694178 | JF694246 |
|                                               | (2) Spain, Huelva, Matalascañas        | M. Fernández-Mazuecos & J.L. Blanco 1MF09 (MA)                         | 1b5 | JF694179 | JF694247 |
| subsp. <i>spicata</i> (Coutinho) D.A. Sutton  | (1) Spain, Jaén, Cazorla               | M. Fernández-Mazuecos 49MF09 (MA)                                      | 1b1 | JF694181 | JF694249 |
|                                               | (2) Spain, Málaga, Cómputa             | M. Fernández-Mazuecos, A.D. Forrest & P. Vargas 9MF08 (MA)             | 1b1 | JF694180 | JF694248 |
| <i>L. weilleri</i> Emberger & Maire           | Morocco, Tihmi                         | Miller, Russell & Sutton s.n. (RNG)                                    | 21  | JF694182 | JF694250 |
| Subsect. <i>Elegantes</i> (Viano) D.A. Sutton |                                        |                                                                        |     |          |          |
| <i>L. elegans</i> Cav.                        | (1) Spain, Orense, San Xoán de Río     | M. Fernández-Mazuecos 45MF08 (MA)                                      | Le2 | JF694184 | JF694252 |
|                                               | (2) Spain, Ávila, Plataforma de Gredos | E. Amat s.n. (MA)                                                      | Le1 | JF694183 | JF694251 |
| <i>L. nigricans</i> Lange                     | (1) Spain, Almería, Tabernas           | P. Vargas 3PV08 (MA)                                                   | Ln2 | JF694186 | JF694254 |
|                                               | (2) Spain, Almería, Cabo de Gata       | M. Fernández-Mazuecos 29MF09 (MA)                                      | Ln1 | JF694185 | JF694253 |
